# Supplementary material
Source: MDPI journal article supplement (https://www.mdpi.com/2077-1312/7/11/395)
Supplement: s1 [file s1]

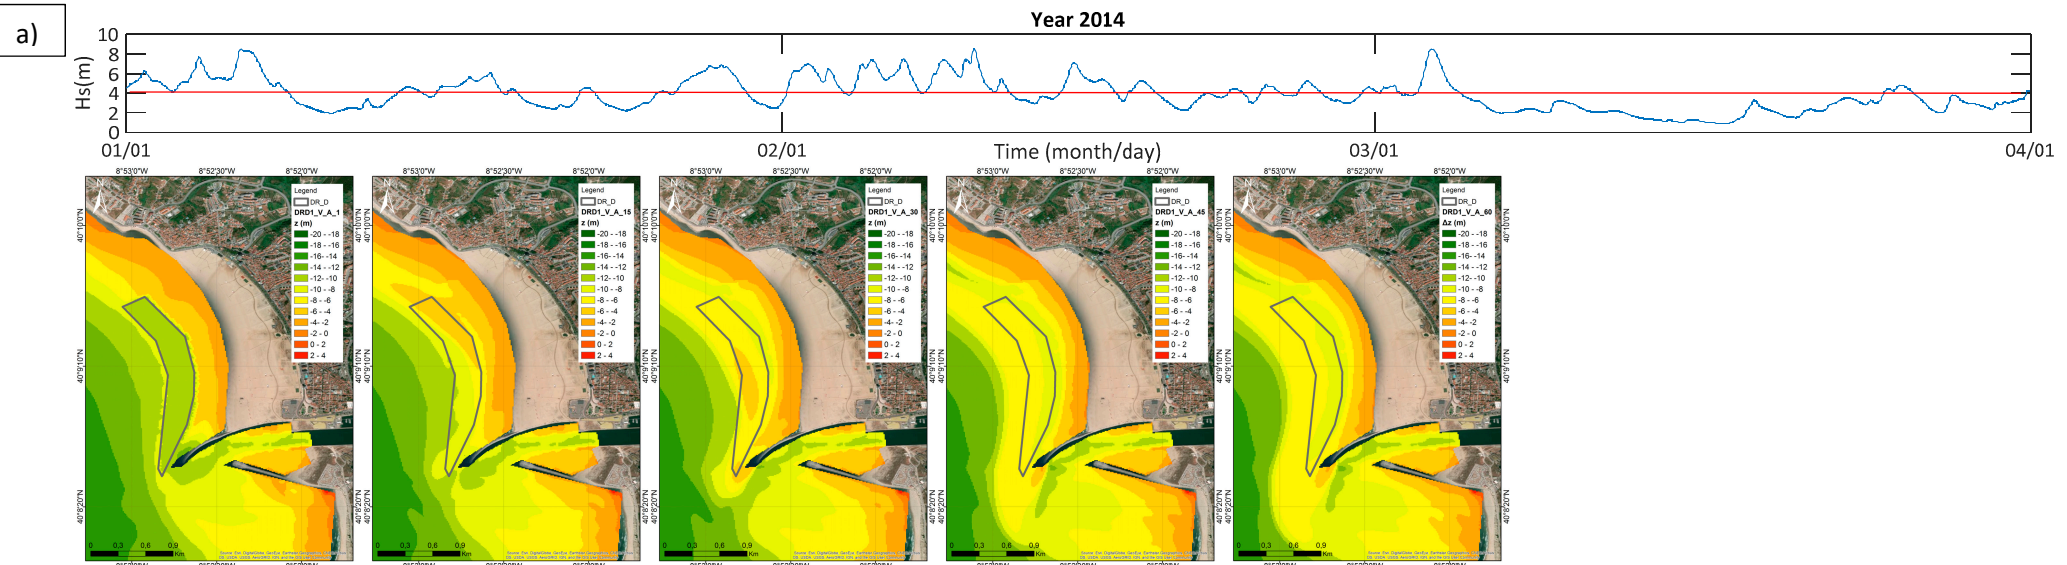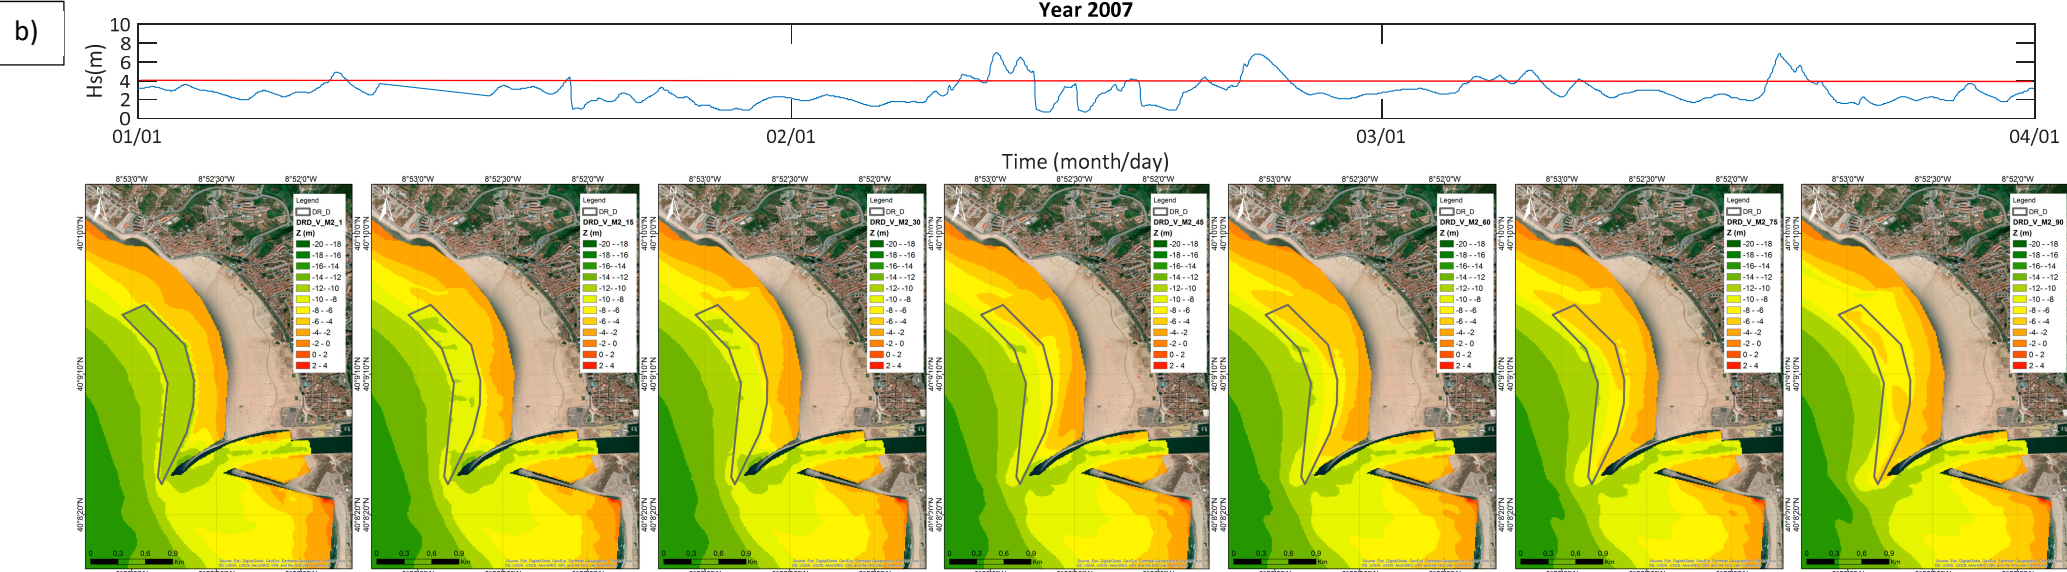

c)

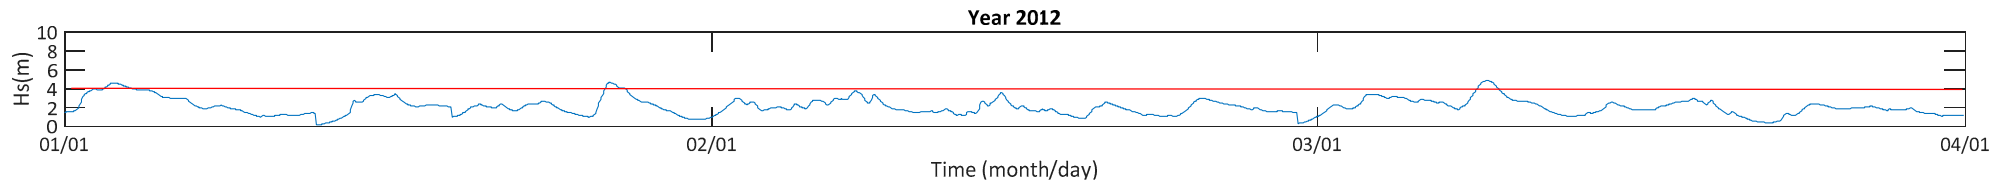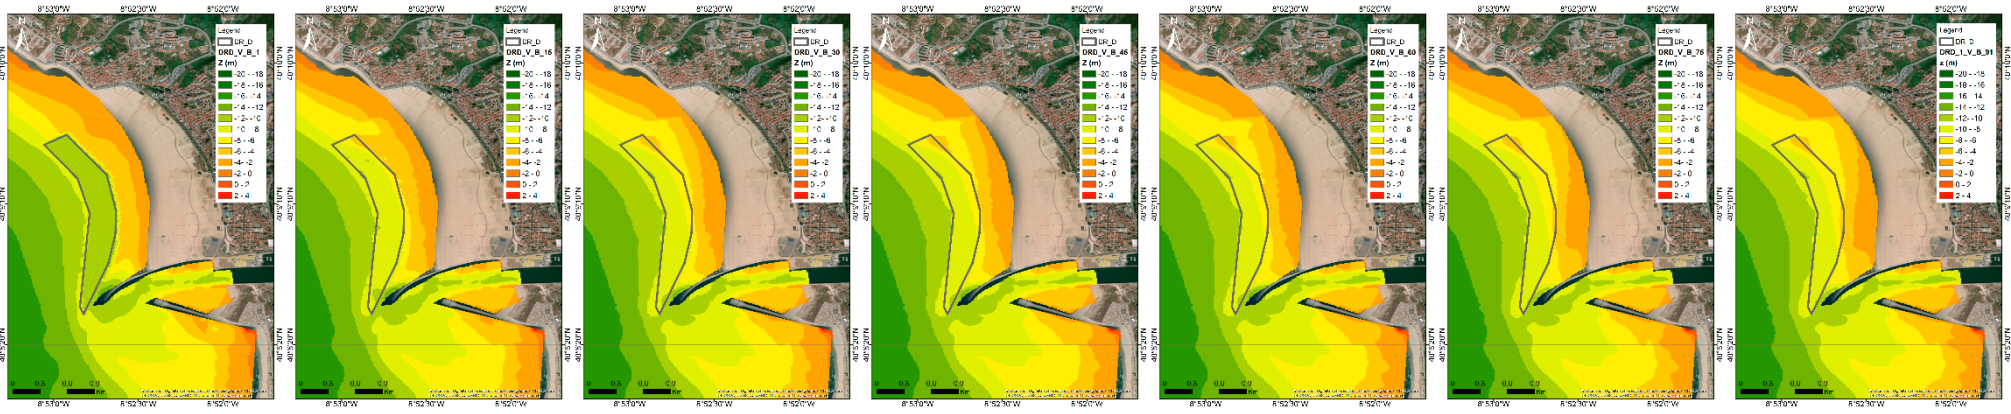

DAYS 1

15

30

45

60

75

90

Supplementary Material\_Figure\_Significant wave height distribution along time with corresponding evolution of bathymetry of Dredge D\_1 scenario depicted with an interval of 15 days to each wave climate scenario: a) high-energy wave (2014); b) medium-energy wave (2007); c) low-energy wave (2012).
